# Supplementary material for: Comparative Evaluation of Juices from Red-Fleshed Apples after Production with Different Dejuicing Systems and Subsequent Storage
Source: MDPI journal article supplement (doi:10.3390/molecules27082459), 2022-04-11
Supplement: s1 [file s1]

# Comparative Evaluation of Juices from Red-Fleshed Apples after Production with Different Dejuicing Systems and Subsequent Storage

Annette Wagner <sup>1</sup>, Stefan Dussling <sup>1</sup>, Stefano Scansani <sup>2</sup>, Peter Bach <sup>1</sup>, Michael Ludwig <sup>1</sup>, Christof B. Steingass <sup>1</sup>, Frank Will <sup>1</sup> and Ralf Schweiggert <sup>1,\*</sup>

<sup>1</sup> Workgroup Analysis and Technology of Plant-based Foods, Department of Beverage Research, Hochschule Geisenheim University, Von-Lade-Strasse 1, 65366 Geisenheim, Germany

<sup>2</sup> Department of Microbiology and Biochemistry, Hochschule Geisenheim University, Von-Lade-Strasse 1, 65366 Geisenheim, Germany

\* Correspondence: ralf.schweiggert@hs-gm.de; Tel.: +49-6722 -502-311; Fax: +49-6722-502-310

**Table S1.** Oxygen contents in juices derived from three pressing systems during 24 weeks of storage at three temperatures (4, 20, and 37°C) in 2020. Data represent means and standard deviations of two technological replicates.

|      |                  | Week       |             |             |             |             |             |             |
|------|------------------|------------|-------------|-------------|-------------|-------------|-------------|-------------|
|      |                  | 0          | 2           | 4           | 6           | 12          | 16          | 24          |
| 4°C  | spiral press     | 6.56 ± 0.9 | 1.43 ± 0.49 | 0.64 ± 0.08 | 0.23 ± 0.08 | 0.22 ± 0.05 | 0.23 ± 0.05 | 0.25 ± 0.00 |
|      | horizontal press | 6.80 ± 0.3 | 1.31 ± 0.62 | 0.45 ± 0.18 | 0.22 ± 0.01 | 0.14 ± 0.01 | 0.15 ± 0.03 | 0.19 ± 0.02 |
|      | decanter         | 7.28 ± 0.3 | 1.00 ± 0.21 | 0.51 ± 0.08 | 0.33 ± 0.01 | 0.37 ± 0.16 | 0.23 ± 0.14 | 0.25 ± 0.06 |
| 20°C | spiral press     | 6.56 ± 0.9 | 0.83 ± 0.00 | 0.40 ± 0.13 | 0.26 ± 0.09 | 0.13 ± 0.00 | 0.12 ± 0.01 | 0.18 ± 0.08 |
|      | horizontal press | 6.80 ± 0.3 | 0.95 ± 0.03 | 0.37 ± 0.10 | 0.30 ± 0.06 | 0.11 ± 0.01 | 0.22 ± 0.17 | 0.09 ± 0.05 |
|      | decanter         | 7.28 ± 0.3 | 0.95 ± 0.04 | 0.60 ± 0.24 | 0.34 ± 0.02 | 0.15 ± 0.01 | 0.16 ± 0.00 | 0.14 ± 0.08 |
| 37°C | spiral press     | 6.56 ± 0.9 | 0.92 ± 0.05 | 0.40 ± 0.04 | 0.19 ± 0.04 | 0.12 ± 0.01 | 0.14 ± 0.01 | 0.22 ± 0.07 |
|      | horizontal press | 6.80 ± 0.3 | 0.88 ± 0.01 | 0.40 ± 0.13 | 0.21 ± 0.04 | 0.11 ± 0.01 | 0.09 ± 0.01 | 0.19 ± 0.08 |
|      | decanter         | 7.28 ± 0.3 | 1.20 ± 0.40 | 0.46 ± 0.21 | 0.22 ± 0.09 | 0.11 ± 0.00 | 0.10 ± 0.01 | 0.27 ± 0.00 |

**Table S2.** Chromameter CIE-L\*a\*b\* values of cloudy raw juice derived of dejuicing red-fleshed apples with three different pressing systems in 2019 (n=2, technological replicates) and 2020 (n=2).

|              | 2019                     |                           |                         | 2020                    |                           |                         |
|--------------|--------------------------|---------------------------|-------------------------|-------------------------|---------------------------|-------------------------|
|              | Spiral<br>filter press   | Horizotal<br>filter press | Decanter                | Spiral<br>filter press  | Horizotal<br>filter press | Decanter                |
| CIE-L*a*b*   |                          |                           |                         |                         |                           |                         |
| L*           | 36.5 ± 0.1 <sup>a</sup>  | 31.2 ± 0.3 <sup>c</sup>   | 33 ± 0.1 <sup>b</sup>   | 35.1 ± 0.7 <sup>a</sup> | 30.2 ± 0.3 <sup>c</sup>   | 32.6 ± 0.1 <sup>b</sup> |
| a*           | 17.5 ± 0.9 <sup>a</sup>  | 5.3 ± 0.1 <sup>b</sup>    | 4.9 ± 0.2 <sup>b</sup>  | 18.4 ± 1 <sup>a</sup>   | 4.7 ± 0.3 <sup>b</sup>    | 6.1 ± 1.8 <sup>b</sup>  |
| b*           | 3.8 ± 0.4                | 2.4 ± 0.2                 | 3.2 ± 0.6               | 5.1 ± 0.3 <sup>a</sup>  | 1.6 ± 0.1 <sup>b</sup>    | 2.9 ± 0.7 <sup>b</sup>  |
| hue angle h° | 12.2 ± 0.6 <sup>ab</sup> | 24.3 ± 1.7 <sup>b</sup>   | 32.5 ± 6.4 <sup>a</sup> | 15.3 ± 0.1              | 19.4 ± 2.3                | 27 ± 12.1               |
| chroma C*    | 17.9 ± 0.9 <sup>a</sup>  | 5.8 ± 0 <sup>b</sup>      | 5.9 ± 0.2 <sup>b</sup>  | 19.1 ± 1.1 <sup>a</sup> | 4.9 ± 0.2 <sup>b</sup>    | 6.8 ± 1.4 <sup>b</sup>  |

Different superscript letters indicate significant ( $p < 0.05$ ) differences of means within one year.

**Table S3.** Levels of colorless (poly)phenols in juices derived from three pressing systems in 2020 during 24 weeks of storage at 4°C. Data represent means and standard deviations of two technological replicates.

|                              |                         | Week        |             |             |             |             |             |                          |
|------------------------------|-------------------------|-------------|-------------|-------------|-------------|-------------|-------------|--------------------------|
|                              |                         | 0           | 4           | 8           | 12          | 16          | 20          | 24                       |
| phloretin-2'-O-xyloglucoside | spiral filter press     | 73.4 ± 0.4  | 71.2 ± 0.3  | 71.9 ± 0.5  | 72.3 ± 0.5  | 70.9 ± 0.4  | 71.2 ± 0.3  | 69 ± 0 <sup>a</sup>      |
|                              | horizontal filter press | 26.4 ± 0.1  | 25 ± 0.1    | 24.7 ± 0    | 24.7 ± 0.3  | 21.7 ± 0.1  | 17.8 ± 0.1  | 23.6 ± 0.2 <sup>b</sup>  |
|                              | decanter                | 34.9 ± 0.9  | 32.8 ± 1    | 32.7 ± 1    | 27.6 ± 0    | 26.3 ± 0.5  | 31.3 ± 0.9  | 30.9 ± 0.9 <sup>b</sup>  |
| phloretin-2'-O-glucoside     | spiral filter press     | 21.7 ± 0.9  | 20.8 ± 0.8  | 20.3 ± 0.9  | 21.5 ± 0.9  | 21.2 ± 0.9  | 21.1 ± 0.8  | 18.1 ± 0 <sup>a</sup>    |
|                              | horizontal filter press | 12 ± 0      | 11.7 ± 0.1  | 11.2 ± 0.2  | 11.8 ± 0    | 10.5 ± 0.1  | 8.5 ± 0.1   | 11.5 ± 0 <sup>b</sup>    |
|                              | decanter                | 10.6 ± 0.3  | 9.9 ± 0.3   | 10.1 ± 0.3  | 9.1 ± 0     | 8.6 ± 0.1   | 10.1 ± 0.3  | 9.9 ± 0.3 <sup>b</sup>   |
| 4-O-caffeoylquinic acid      | spiral filter press     | 3.9 ± 0.1   | 3.5 ± 0     | 3.7 ± 0     | 3.4 ± 0.1   | 3.5 ± 0.1   | 3.8 ± 0     | 3.5 ± 0 <sup>b</sup>     |
|                              | horizontal filter press | 10.6 ± 0.3  | 9.8 ± 0.1   | 11.2 ± 0.3  | 11.3 ± 0    | 10.1 ± 0.2  | 8.2 ± 0.3   | 11.5 ± 0 <sup>a</sup>    |
|                              | decanter                | 9.8 ± 0.3   | 8.9 ± 0.4   | 11.4 ± 0    | 11.4 ± 0    | 9.9 ± 0     | 11.3 ± 0    | 11.2 ± 0.2 <sup>a</sup>  |
| 5-O-caffeoylquinic acid      | spiral filter press     | 150.6 ± 1.5 | 143.8 ± 1.6 | 142.3 ± 2.3 | 143.2 ± 2.3 | 141.6 ± 1.4 | 138.7 ± 0.1 | 142.8 ± 1.8 <sup>a</sup> |
|                              | horizontal filter press | 49.2 ± 1.2  | 45.3 ± 1.2  | 44.1 ± 0.1  | 45 ± 1.6    | 40.4 ± 0.6  | 33.2 ± 0.1  | 46 ± 1.2 <sup>b</sup>    |
|                              | decanter                | 57.3 ± 4.2  | 52.5 ± 4.4  | 53.3 ± 4.2  | 43.7 ± 0.1  | 43.7 ± 2.2  | 53.1 ± 4    | 53.2 ± 4.6 <sup>b</sup>  |
| 4-O-p-coumaroylquinic        | spiral filter press     | 62.5 ± 0.5  | 60.5 ± 0.5  | 55.8 ± 0.2  | 59.1 ± 0.2  | 58.3 ± 0.4  | 60.1 ± 0    | 59.3 ± 0.5 <sup>a</sup>  |
|                              | horizontal filter press | 30.2 ± 0.3  | 28.5 ± 0.3  | 25 ± 0.7    | 27.7 ± 0.1  | 24.7 ± 0.4  | 20.7 ± 0.7  | 28.2 ± 0.3 <sup>b</sup>  |
|                              | decanter                | 38.7 ± 1.2  | 37.2 ± 1.4  | 34.3 ± 1.4  | 33.3 ± 0    | 31.5 ± 0.7  | 36.5 ± 1.3  | 36.7 ± 1.5 <sup>b</sup>  |
| quercetin-3-O-galactoside    | spiral filter press     | 4.2 ± 0.2   | 4 ± 0.2     | 3.9 ± 0.2   | 4 ± 0.2     | 3.9 ± 0.2   | 3.3 ± 0     | 4 ± 0.2                  |
|                              | horizontal filter press | 4 ± 0       | 3.8 ± 0     | 3.6 ± 0.1   | 3.8 ± 0     | 3.4 ± 0     | 2.9 ± 0     | 3.7 ± 0                  |
|                              | decanter                | 2.7 ± 0.1   | 2.6 ± 0.1   | 2.6 ± 0.1   | 2.4 ± 0     | 2.3 ± 0     | 2.5 ± 0.1   | 2.6 ± 0.1                |
| quercetin-3-O-arabinoside    | spiral filter press     | 1.6 ± 0.1   | 1.6 ± 0.1   | 1.6 ± 0.1   | 1.6 ± 0.1   | 1.6 ± 0.1   | 1.4 ± 0     | 1.6 ± 0.1                |
|                              | horizontal filter press | 1.7 ± 0     | 1.7 ± 0     | 1.6 ± 0     | 1.6 ± 0     | 1.5 ± 0     | 1.3 ± 0     | 1.6 ± 0                  |
|                              | decanter                | 1.2 ± 0     | 1.2 ± 0     | 1.2 ± 0     | 1.1 ± 0     | 1 ± 0       | 1.1 ± 0     | 1.2 ± 0                  |
| quercetin-3-O-rhamnoside     | spiral filter press     | 2.8 ± 0.1   | 2.7 ± 0.1   | 2.7 ± 0.1   | 2.8 ± 0.1   | 2.7 ± 0.1   | 2.4 ± 0     | 2.8 ± 0.1                |
|                              | horizontal filter press | 2.2 ± 0     | 2.1 ± 0     | 2 ± 0       | 2.2 ± 0     | 1.9 ± 0     | 1.7 ± 0     | 2.1 ± 0                  |
|                              | decanter                | 1.9 ± 0     | 1.8 ± 0     | 1.8 ± 0     | 1.7 ± 0     | 1.6 ± 0     | 1.8 ± 0     | 1.8 ± 0                  |
|                              | spiral filter press     | 323.5 ± 0.5 | 310.9 ± 0.5 | 305 ± 0.7   | 310.5 ± 0.7 | 306.4 ± 0.5 | 304.3 ± 0.3 | 303.5 ± 0.6 <sup>a</sup> |

|                               |                         |             |             |             |             |             |             |                          |
|-------------------------------|-------------------------|-------------|-------------|-------------|-------------|-------------|-------------|--------------------------|
| total colorless (poly)phenols | horizontal filter press | 138.9 ± 0.4 | 130.6 ± 0.4 | 125.9 ± 0.2 | 130.6 ± 0.5 | 116.4 ± 0.2 | 96.5 ± 0.2  | 130.5 ± 0.4 <sup>b</sup> |
|                               | decanter                | 159.3 ± 1.3 | 148.8 ± 1.4 | 149.4 ± 1.3 | 132.1 ± 0   | 126.6 ± 0.7 | 149.5 ± 1.3 | 149.2 ± 1.4 <sup>b</sup> |

Different superscript letters indicate significant ( $p < 0.05$ ) differences of means between the pressing systems for the single colorless (poly)phenols.

**Table S4.** Levels of colorless (poly)phenols in juices derived from three pressing systems in 2020 during 24 weeks of storage at 37°C. Data represent means and standard deviations of two technological replicates.

|                               |                         | Week        |             |             |             |             |             |                          |
|-------------------------------|-------------------------|-------------|-------------|-------------|-------------|-------------|-------------|--------------------------|
|                               |                         | 0           | 4           | 8           | 12          | 16          | 20          | 24                       |
| phloretin-2'-O-xyloglucoside  | spiral filter press     | 73.4 ± 0.4  | 69.1 ± 0.5  | 68.3 ± 0.6  | 67.1 ± 0.4  | 64.1 ± 0.1  | 49.1 ± 0.5  | 58 ± 0 <sup>a</sup>      |
|                               | horizontal filter press | 26.4 ± 0.1  | 24.5 ± 0.2  | 28.6 ± 0.9  | 23.4 ± 0.1  | 19.1 ± 0.4  | 21.6 ± 0.1  | 20.7 ± 0.1 <sup>b</sup>  |
|                               | decanter                | 34.9 ± 0.9  | 31.2 ± 0.8  | 30 ± 0.7    | 30.4 ± 0.7  | 27 ± 0.9    | 24.2 ± 0.9  | 28 ± 0.9 <sup>b</sup>    |
| phloretin-2'-O-glucoside      | spiral filter press     | 21.7 ± 0.9  | 20.8 ± 0.8  | 20.5 ± 1    | 21 ± 1      | 20.7 ± 0.9  | 16 ± 0.4    | 19.3 ± 0.9               |
|                               | horizontal filter press | 12 ± 0      | 11.6 ± 0    | 10.9 ± 0.1  | 11.7 ± 0    | 9.9 ± 0.3   | 11.4 ± 0.1  | 11.1 ± 0.1               |
|                               | decanter                | 10.6 ± 0.3  | 10.1 ± 0.2  | 9.9 ± 0.2   | 10.2 ± 0.3  | 9.3 ± 0.4   | 8.5 ± 0.4   | 9.6 ± 0.3                |
| 4-O-caffeoylquinic acid       | spiral filter press     | 3.9 ± 0.1   | 3.6 ± 0     | 3.6 ± 0     | 4.1 ± 0     | 4.3 ± 0     | 3.4 ± 0.2   | 4.6 ± 0.1 <sup>b</sup>   |
|                               | horizontal filter press | 10.6 ± 0.3  | 9.1 ± 0     | 9.6 ± 0.3   | 9.3 ± 0     | 7.3 ± 0.2   | 8.3 ± 0     | 7.8 ± 0 <sup>a</sup>     |
|                               | decanter                | 9.8 ± 0.3   | 7.8 ± 0.4   | 9.3 ± 0     | 9.1 ± 0     | 7.8 ± 0.2   | 6.9 ± 0.4   | 7.7 ± 0 <sup>a</sup>     |
| 5-O-caffeoylquinic acid       | spiral filter press     | 150.6 ± 1.5 | 135.1 ± 1   | 125.3 ± 2.7 | 122.3 ± 1.8 | 117 ± 1.1   | 92.7 ± 2.3  | 110.9 ± 1.4 <sup>a</sup> |
|                               | horizontal filter press | 49.2 ± 1.2  | 42.4 ± 1.3  | 40 ± 0.4    | 40.5 ± 0.7  | 33.1 ± 2    | 37.9 ± 1    | 37.2 ± 0.9 <sup>b</sup>  |
|                               | decanter                | 57.3 ± 4.2  | 48.1 ± 3.5  | 45.8 ± 3    | 46.6 ± 3.3  | 41.6 ± 3.8  | 37.6 ± 3.9  | 44.3 ± 3.8 <sup>b</sup>  |
| 4-O-p-coumaroylquinic         | spiral filter press     | 62.5 ± 0.5  | 56 ± 0.4    | 47.7 ± 0.1  | 46.8 ± 0.1  | 43.6 ± 0.3  | 33.4 ± 1.4  | 38.4 ± 0.3 <sup>a</sup>  |
|                               | horizontal filter press | 30.2 ± 0.3  | 26.5 ± 0.2  | 21.9 ± 0.4  | 22.3 ± 0.3  | 17.7 ± 0.5  | 19.4 ± 0.1  | 18.5 ± 0.2 <sup>b</sup>  |
|                               | decanter                | 38.7 ± 1.2  | 33.5 ± 1    | 28.3 ± 0.8  | 29.1 ± 0.8  | 25.1 ± 1.3  | 21.6 ± 1.3  | 24.5 ± 0.9 <sup>b</sup>  |
| quercetin-3-O-galactoside     | spiral filter press     | 4.2 ± 0.2   | 3.7 ± 0.2   | 3.2 ± 0.2   | 3 ± 0.2     | 2.8 ± 0.2   | 2 ± 0.1     | 2.2 ± 0.1                |
|                               | horizontal filter press | 4 ± 0       | 3.6 ± 0     | 3.1 ± 0     | 3 ± 0       | 2.4 ± 0     | 2.5 ± 0     | 2.4 ± 0                  |
|                               | decanter                | 2.7 ± 0.1   | 2.4 ± 0.1   | 2.1 ± 0     | 2.1 ± 0     | 1.8 ± 0.1   | 1.6 ± 0.1   | 1.6 ± 0                  |
| quercetin-3-O-arabinoside     | spiral filter press     | 1.6 ± 0.1   | 1.1 ± 0.1   | 0.8 ± 0     | 0.6 ± 0     | 0.8 ± 0.1   | 0.5 ± 0     | 0.5 ± 0                  |
|                               | horizontal filter press | 1.7 ± 0     | 1.2 ± 0     | 0.9 ± 0     | 0.7 ± 0     | 0.6 ± 0     | 0.5 ± 0     | 0.5 ± 0                  |
|                               | decanter                | 1.2 ± 0     | 0.8 ± 0     | 0.7 ± 0     | 0.6 ± 0     | 0.5 ± 0     | 0.5 ± 0     | 0.5 ± 0                  |
| quercetin-3-O-rhamnoside      | spiral filter press     | 2.8 ± 0.1   | 2.5 ± 0.1   | 2.2 ± 0.1   | 2.1 ± 0.1   | 1.9 ± 0.1   | 1.5 ± 0     | 1.6 ± 0.1                |
|                               | horizontal filter press | 2.2 ± 0     | 2.1 ± 0     | 1.8 ± 0     | 1.8 ± 0     | 1.5 ± 0     | 1.6 ± 0     | 1.5 ± 0                  |
|                               | decanter                | 1.9 ± 0     | 1.8 ± 0     | 1.5 ± 0     | 1.5 ± 0     | 1.3 ± 0     | 1.2 ± 0     | 1.3 ± 0                  |
| total colorless (poly)phenols | spiral filter press     | 316.8 ± 0.5 | 294.3 ± 0.4 | 274 ± 0.8   | 269 ± 0.6   | 257.1 ± 0.4 | 200.1 ± 0.8 | 237 ± 0.5 <sup>a</sup>   |
|                               | horizontal filter press | 132.3 ± 0.4 | 123.3 ± 0.4 | 119 ± 0.3   | 114.6 ± 0.2 | 93.3 ± 0.6  | 105.1 ± 0.3 | 101.4 ± 0.3 <sup>b</sup> |
|                               | decanter                | 155.1 ± 1.5 | 137.5 ± 1.1 | 129.3 ± 0.9 | 131.1 ± 1   | 115.8 ± 1.2 | 103.4 ± 1.2 | 118.7 ± 1.2 <sup>b</sup> |

Different superscript letters indicate significant ( $p < 0.05$ ) differences of means between the pressing systems for the single colorless (poly)phenols.

**Table S5.** Antioxidant capacity (TEAC assay) in juices derived from three pressing systems during 24 weeks of storage at two temperatures (4 and 20°C) in 2020. Data represent means and standard deviations of two technological replicates.

|      |                  | Week        |             |                           |
|------|------------------|-------------|-------------|---------------------------|
|      |                  | 0           | 12          | 24                        |
| 4°C  | spiral press     | 6.52 ± 0.68 | 5.43 ± 0.45 | 6.08 ± 1.10 <sup>a</sup>  |
|      | horizontal press | 3.55 ± 0.48 | 2.90 ± 0.17 | 2.99 ± 0.90 <sup>b</sup>  |
|      | decanter         | 3.92 ± 0.63 | 3.21 ± 0.48 | 3.64 ± 0.95 <sup>ab</sup> |
| 20°C | spiral press     | 6.52 ± 0.68 | 4.61 ± 0.99 | 6.04 ± 1.01 <sup>a</sup>  |
|      | horizontal press | 3.55 ± 0.48 | 2.89 ± 0.30 | 2.92 ± 0.64 <sup>b</sup>  |
|      | decanter         | 3.92 ± 0.48 | 3.27 ± 0.32 | 3.53 ± 3.53 <sup>b</sup>  |

Different superscript letters indicate significant ( $p < 0.05$ ) differences of means between the pressing systems within one storage temperature.
